# Supplementary material for: Interfacial Voids Trigger Carbon-Based, All-Inorganic CsPbIBr2 Perovskite Solar Cells with Photovoltage Exceeding 1.33 V
Source: PubMed Central journal article supplement (PMC7770772; doi:10.1007/s40820-020-00425-1), 2020-04-06
Supplement: 40820_2020_425_MOESM1_ESM.pdf [file 40820_2020_425_MOESM1_ESM.pdf]

Supporting Information for

## Interfacial Voids Trigger Carbon-Based, All-Inorganic CsPbIBr<sub>2</sub> Perovskite Solar Cells with Photovoltage Exceeding 1.33 V

Weidong Zhu<sup>1,\*</sup>, Zeyang Zhang<sup>1</sup>, Dandan Chen<sup>2</sup>, Wenming Chai<sup>1</sup>, Dazheng Chen<sup>1</sup>, Jincheng Zhang<sup>1</sup>, Chunfu Zhang<sup>1,\*</sup>, Yue Hao<sup>1</sup>

<sup>1</sup>State Key Discipline Laboratory of Wide Band Gap Semiconductor Technology & Shaanxi Joint Key Laboratory of Graphene, School of Microelectronics, Xidian University, Xi'an 710071, People's Republic of China

<sup>2</sup>College of Science, Xi'an Shiyou University, Xi'an, Shaanxi 710065, People's Republic of China

Weidong Zhu and Zeyang Zhang contributed equally to this work

\*Corresponding authors. E-mail: wdzhu@xidian.edu.cn (Weidong Zhu); cfzhang@xidian.edu.cn (Chunfu Zhang)

### Supplementary Figures and Table

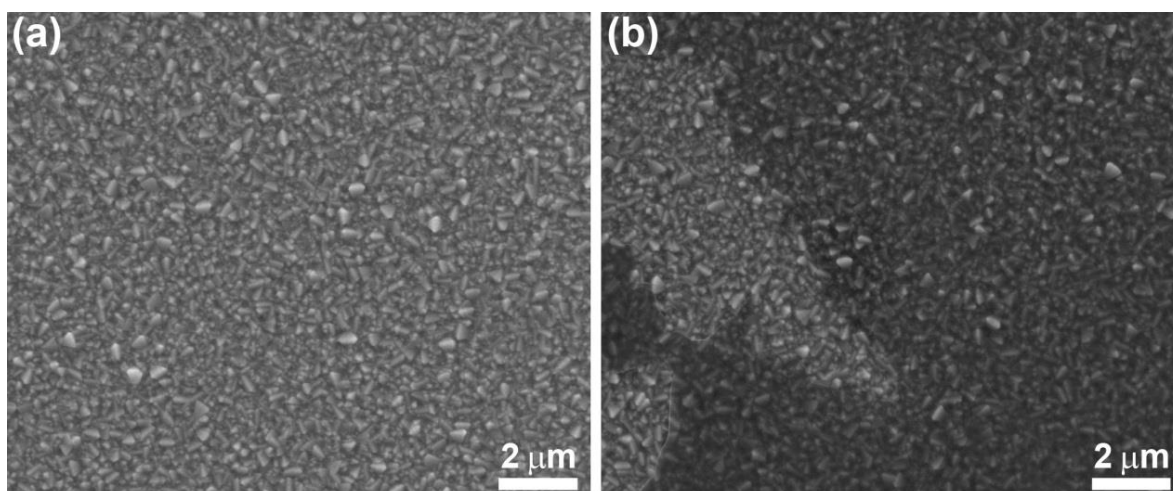

**Fig. S1** SEM images of FTO/TiO<sub>2</sub> substrates: **a** without and **b** with loading of PEAI species. The dark area in panel **b** indicates the loading of PEAI species

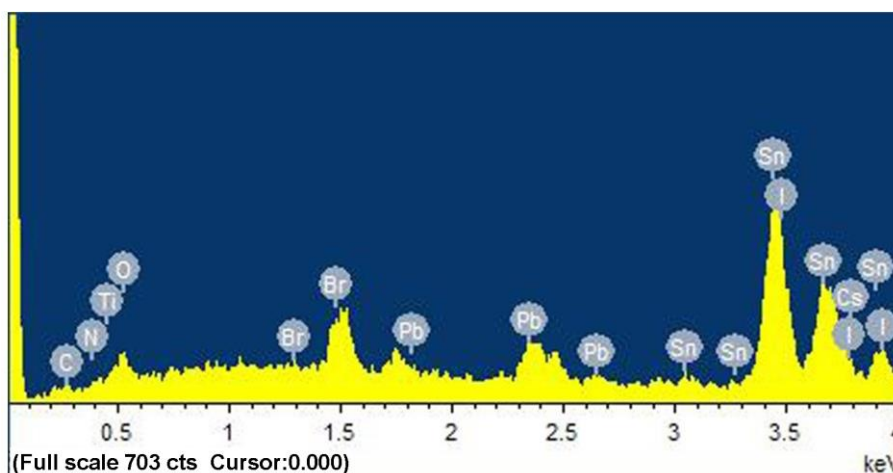

**Fig. S2** EDS spectra of CsPbIBr<sub>2</sub> film deposited on FTO/TiO<sub>2</sub> substrate with loading of PEAI species.

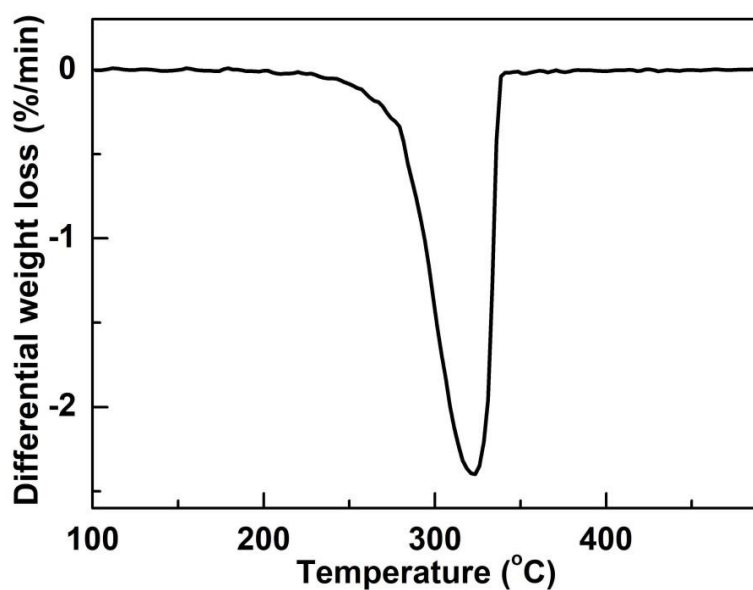

**Fig. S3** Differential thermogravimetric curve PEAI powder as a function of applied temperature

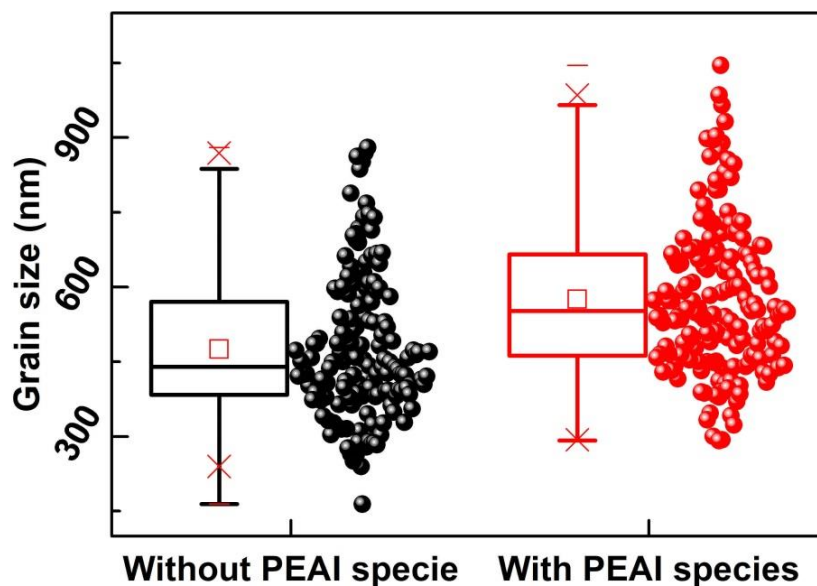

**Fig. S4** Statistical grain sizes of CsPbIBr<sub>2</sub> films deposited on FTO/TiO<sub>2</sub> substrates without and with loading of PEAI species

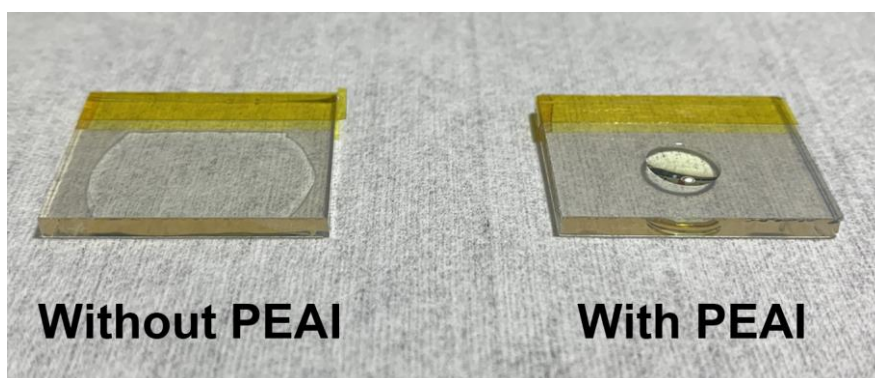

**Fig. S5** Optical images of CsPbIBr<sub>2</sub> precursor on FTO/TiO<sub>2</sub> substrates without and with loading of PEAI species

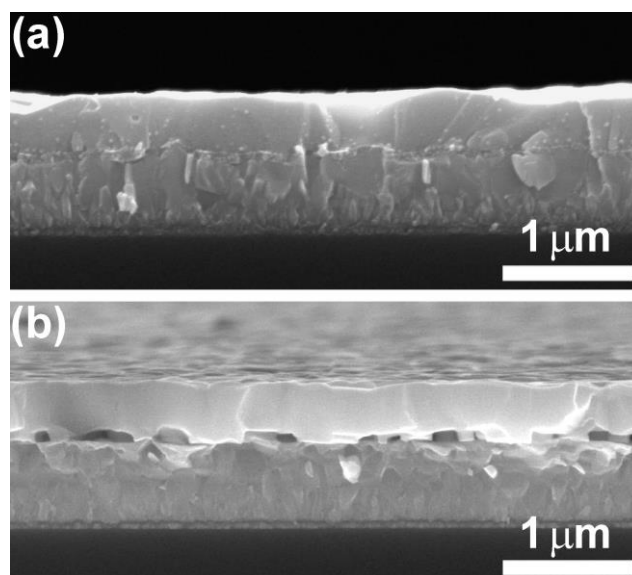

**Fig. S6** High-resolution cross-sectional SEM images of CsPbIBr<sub>2</sub> films deposited on FTO/TiO<sub>2</sub> substrates: **a** without and **b** with loading of PEAI species

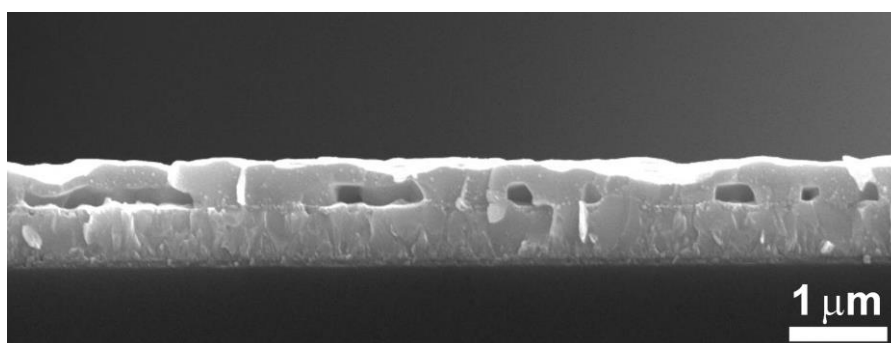

**Fig. S7** Cross-sectional SEM image of CsPbIBr<sub>2</sub> film prepared with 10 mg mL<sup>-1</sup> PEAI solution

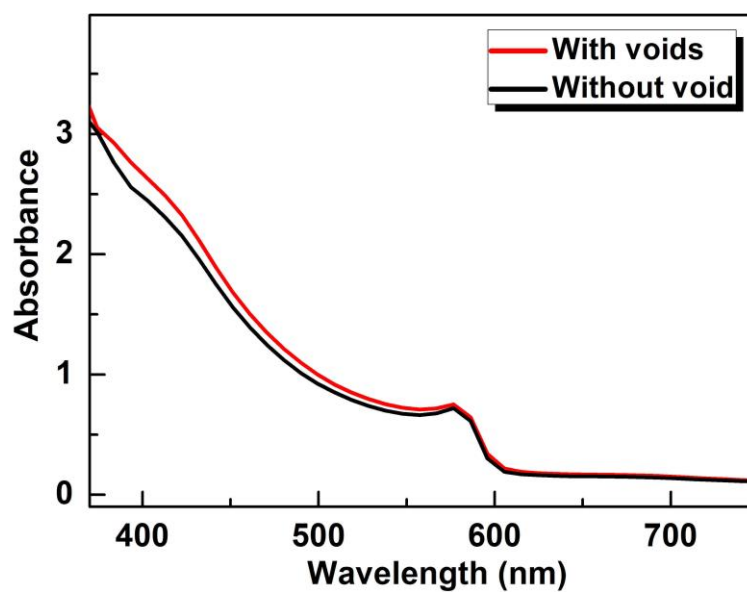

**Fig. S8** UV-vis absorption spectra collected from the side of FTO glass for CsPbIBr<sub>2</sub> films without and with interfacial voids, respectively, wherein the detection beam streams from the top surface of CsPbIBr<sub>2</sub> films

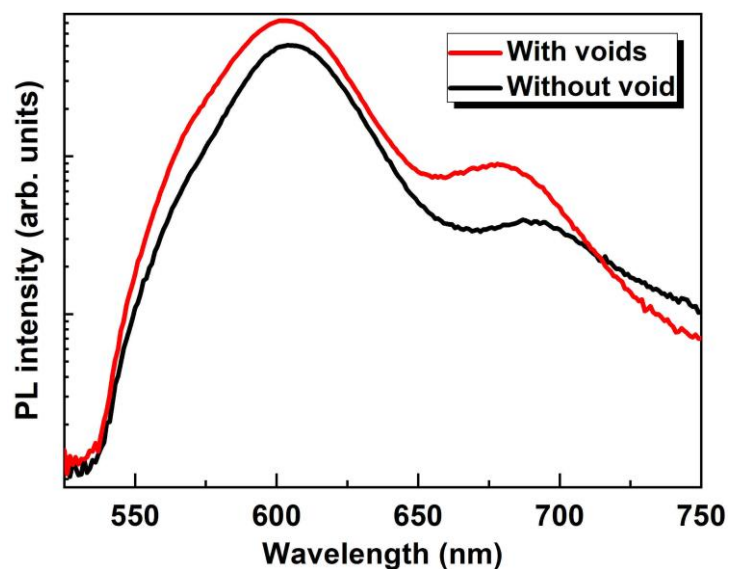

**Fig. S9** Logarithmic-scale steady-state PL spectra of CsPbIBr<sub>2</sub> films without and with interfacial voids on insulating glass substrates instead of FTO/TiO<sub>2</sub> substrates

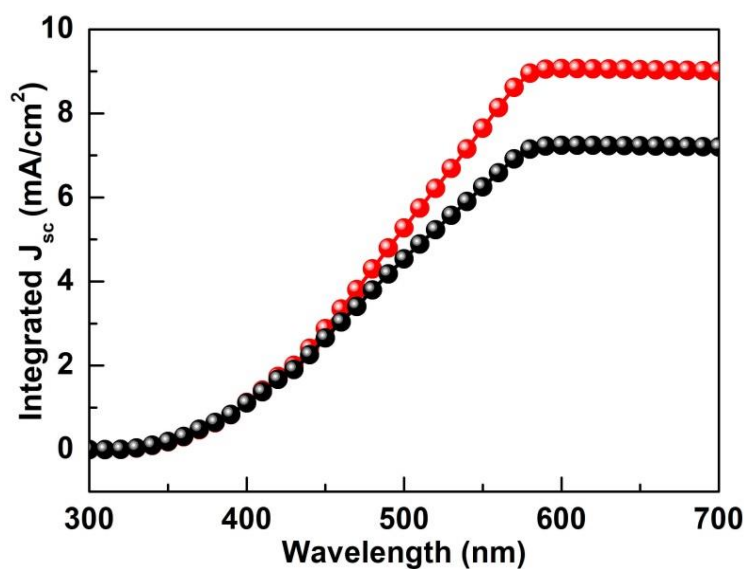

**Fig. S10** Integrated  $J_{sc}$  curves of the champion cells based on CsPbIBr<sub>2</sub> films without and with interfacial voids

**Table S1** Fitted parameters of (100) and (200) XRD peaks of CsPbIBr<sub>2</sub> films without and with interfacial voids

| Samples      | Peak of (100) plane |           |        | Peak of (200) plane |           |        |
|--------------|---------------------|-----------|--------|---------------------|-----------|--------|
|              | Position            | Intensity | FWHM   | Position            | Intensity | FWHM   |
| Without void | 15.13°              | 1072      | 0.163° | 30.44°              | 1321      | 0.190° |
| With voids   | 15.14°              | 1680      | 0.126° | 30.42°              | 1917      | 0.177° |
